# Supplementary material
Source: PubMed Central journal article supplement (PMC9990147)
Supplement: NIHMS1868166-supplement-34040256_SusanLea_Supplematerial.pdf [file NIHMS1868166-supplement-34040256_SusanLea_Supplematerial.pdf]

**Supplementary information**

---

**Structural basis of antifolate recognition  
and transport by PCFT**

---

In the format provided by the  
authors and unedited

Extended Data Figure 2c

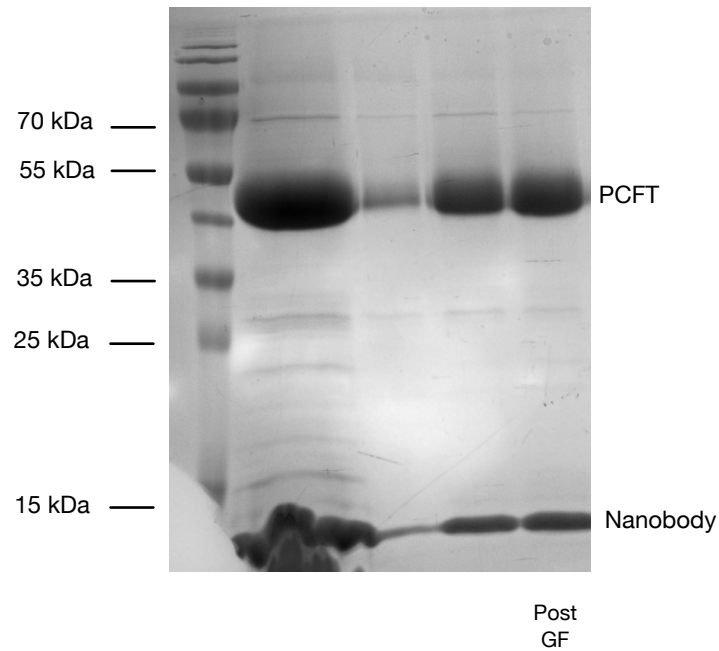

Extended Data Figure 2d

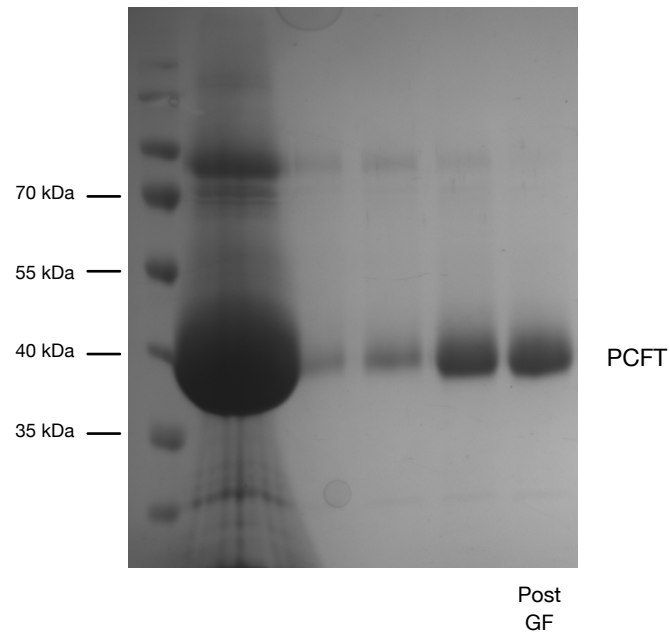

Extended Data Figure 8a

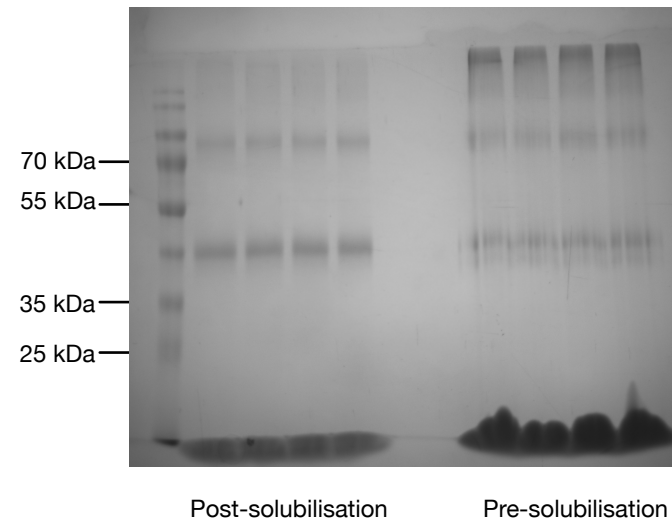

Supplementary Figure 1. Original SDS PAGE gels used to generate extended data figures 2c, 2d and 8a.
